# Supplementary material for: Nascent RNA folding mitigates transcription-associated mutagenesis
Source: HighWire-hosted journal article supplement (doi:10.1101/gr.195164.115), 2015-10-30
Supplement: Figure_S1.pdf [file Figure_S1.pdf]

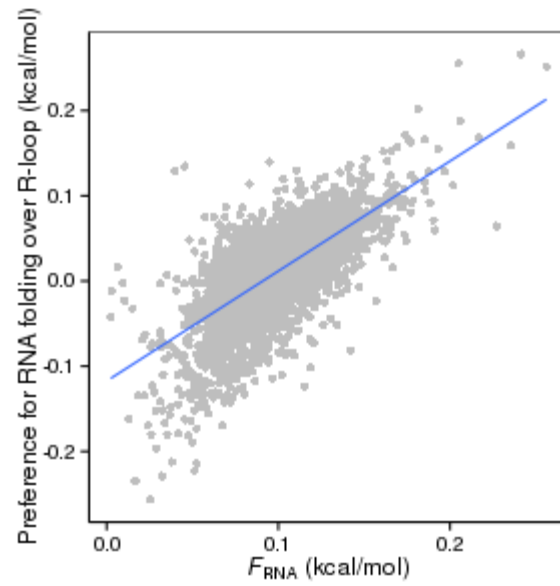

**Figure S1.** Preference of nascent RNA folding over R-loop formation increases as the nascent RNA folding ( $F_{\text{RNA}}$ ) becomes stronger (Spearman's rank correlation = 0.647,  $P < 10^{-99}$ ). Each gray dot represents one of the 6433 intronless yeast genes examined. Blue line shows the fitted line.
