# Supplementary material for: Nascent RNA folding mitigates transcription-associated mutagenesis
Source: HighWire-hosted journal article supplement (doi:10.1101/gr.195164.115), 2015-10-30
Supplement: Figure_S2.pdf [file Figure_S2.pdf]

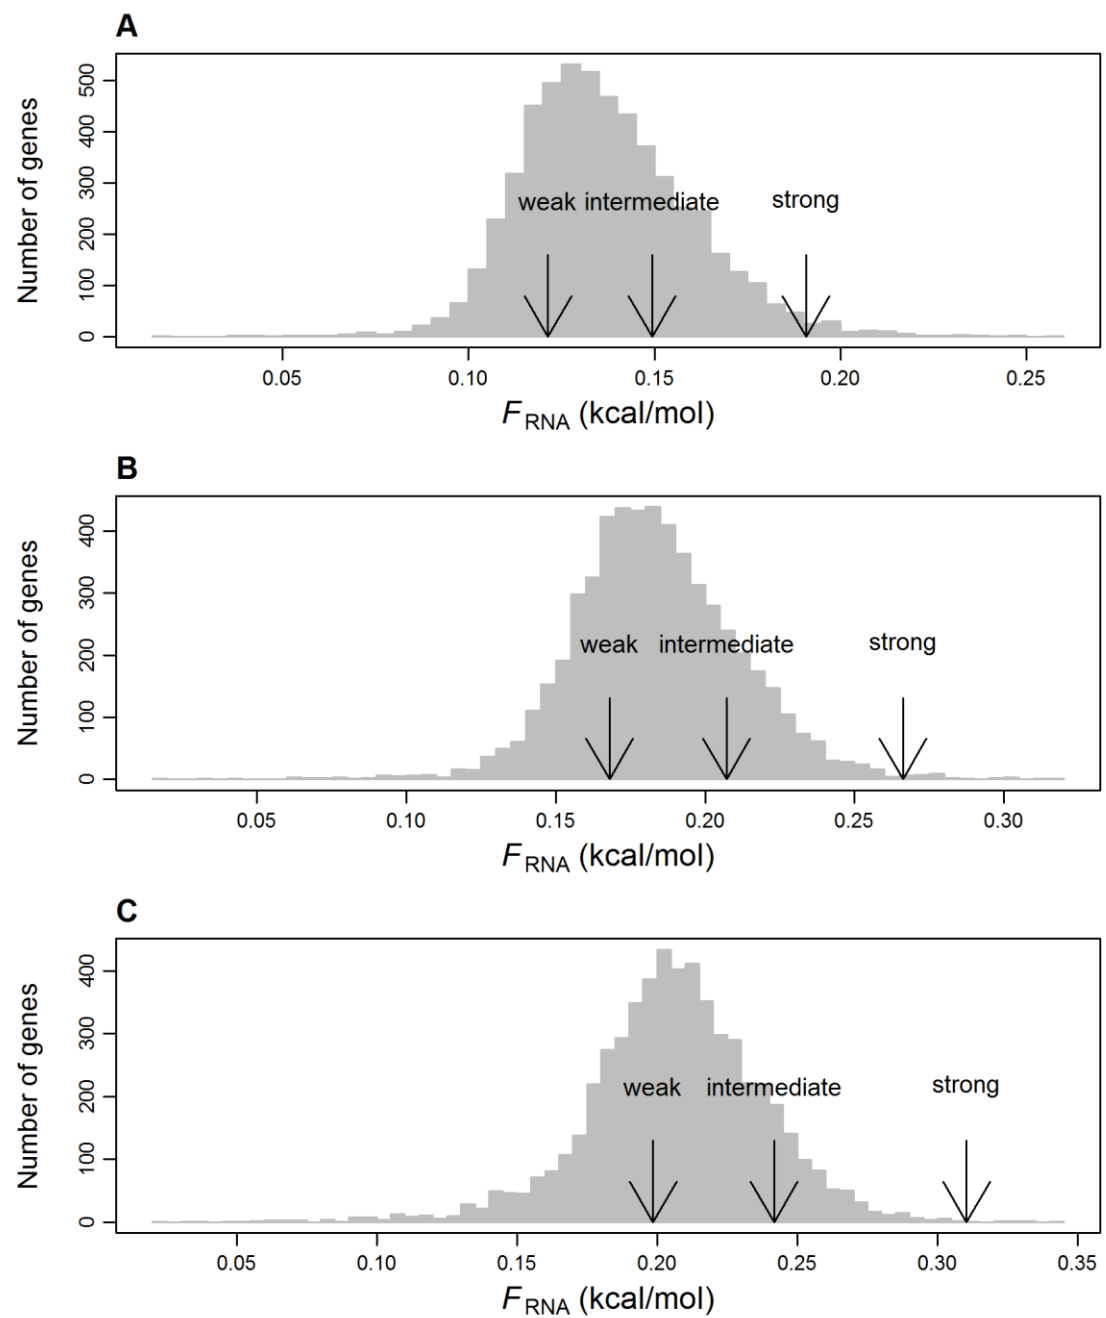

**Figure S2.** Frequency distribution of the RNA folding strength ( $F_{\text{RNA}}$ ) of all yeast genes. The three versions of *CAN1*, with weak, intermediate (wild-type), and strong  $F_{\text{RNA}}$  values, respectively, are indicated by arrows.  $F_{\text{RNA}}$  is computationally predicted using sliding windows of (A) 40, (B) 80, and (C) 150 nucleotides and then standardized to a per site value.
