# Supplementary material for: Nascent RNA folding mitigates transcription-associated mutagenesis
Source: HighWire-hosted journal article supplement (doi:10.1101/gr.195164.115), 2015-10-30
Supplement: Figure_S3.pdf [file Figure_S3.pdf]

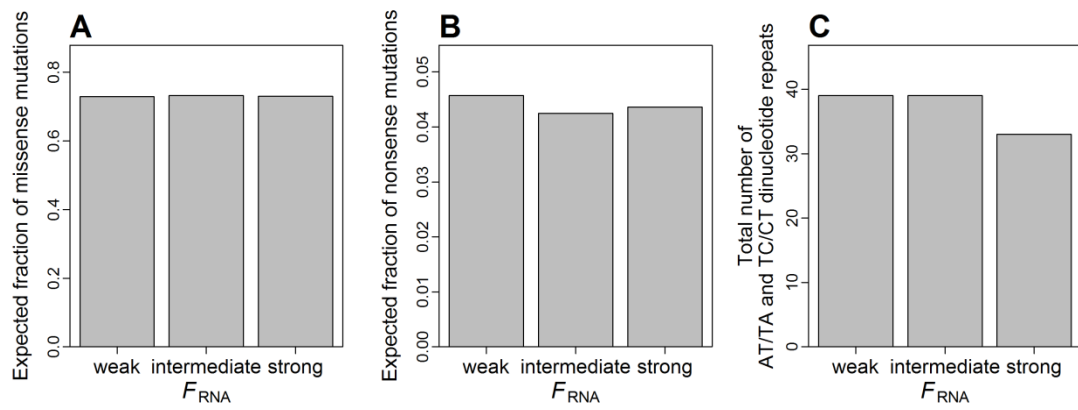

**Figure S3.** Expected fractions of **(A)** missense mutations and **(B)** nonsense mutations among all point mutations and **(C)** numbers of AT/TA and TC/CT dinucleotide repeats in the weak, intermediate (wild-type), and strong  $F_{RNA}$  versions of *CAN1*.
