# Supplementary material for: Nascent RNA folding mitigates transcription-associated mutagenesis
Source: HighWire-hosted journal article supplement (doi:10.1101/gr.195164.115), 2015-10-30
Supplement: Figure_S4.pdf [file Figure_S4.pdf]

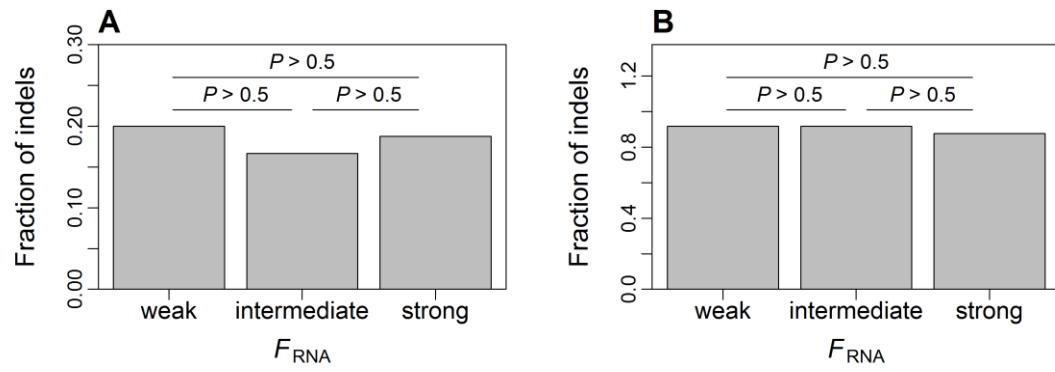

**Figure S4.** Fractions of mutations that are indels in the weak, intermediate (wild-type), and strong  $F_{RNA}$  versions of *CAN1* in **(A)** low-transcription and **(B)** high-transcription strains, determined by Sanger sequencing. The  $P$ -values are from two-tailed Fisher's exact test based on the numbers of indels and base substitutions in each pair of *CAN1* versions.
