# Supplementary material for: Nascent RNA folding mitigates transcription-associated mutagenesis
Source: HighWire-hosted journal article supplement (doi:10.1101/gr.195164.115), 2015-10-30
Supplement: Figure_S6.pdf [file Figure_S6.pdf]

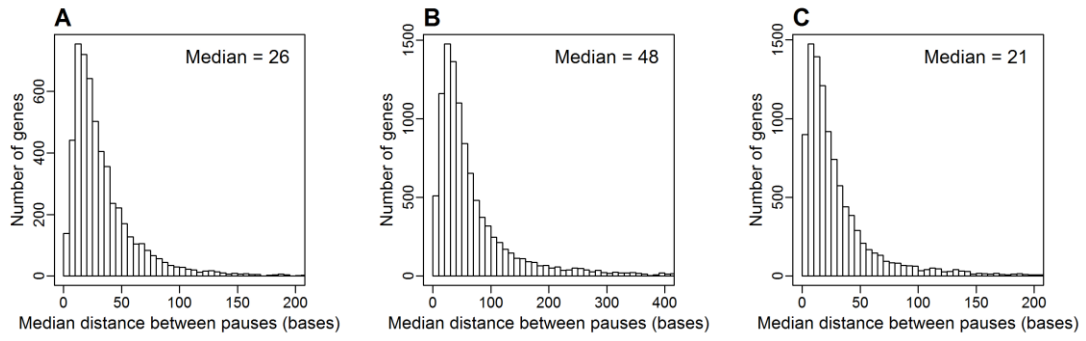

**Figure S6.** Frequency distribution of the median distance between RNA polymerase II pauses in a gene in **(A)** yeast ( $n = 5,483$  genes), **(B)** human introns ( $n = 10,635$  genes), and **(C)** human exons ( $n = 10,234$  genes).
