# Supplementary material for: Nascent RNA folding mitigates transcription-associated mutagenesis
Source: HighWire-hosted journal article supplement (doi:10.1101/gr.195164.115), 2015-10-30
Supplement: Figure_S7.pdf [file Figure_S7.pdf]

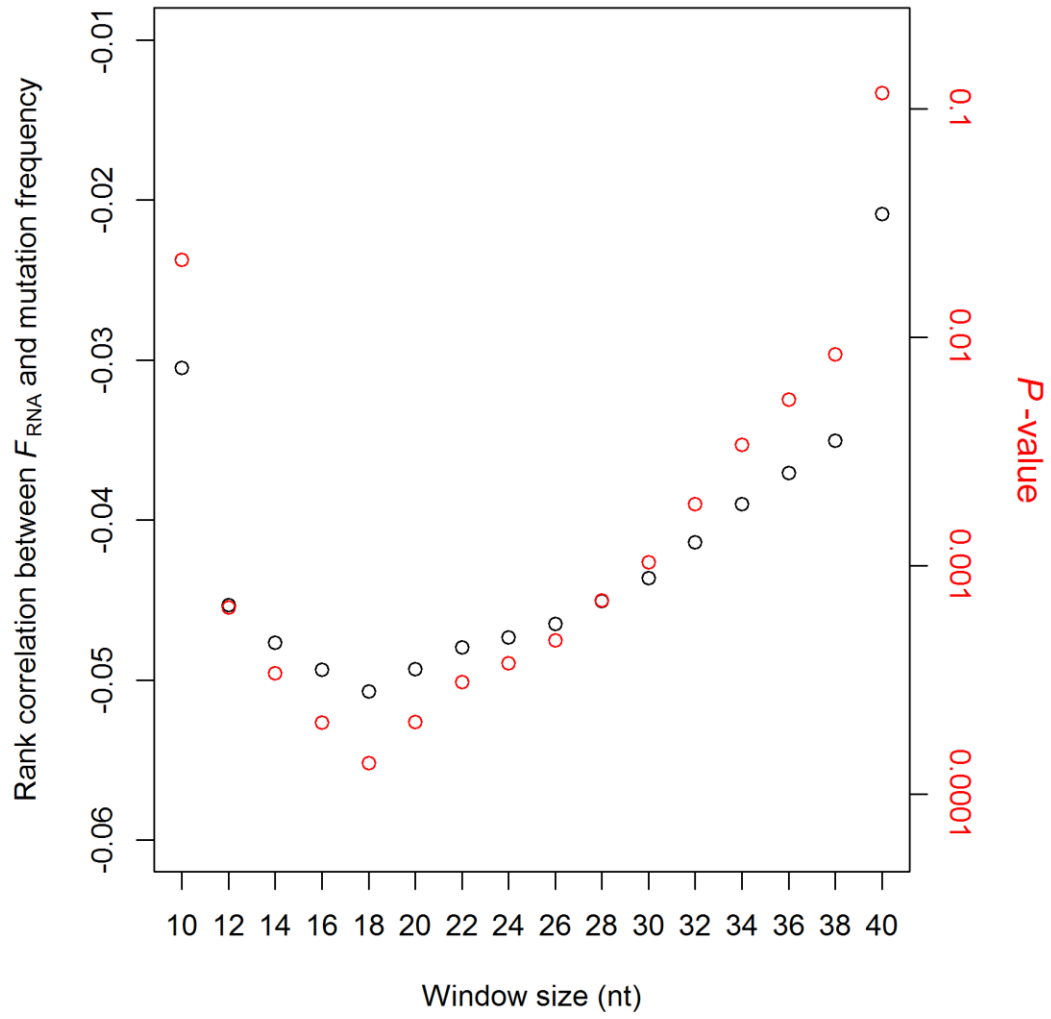

**Figure S7.** Spearman's rank correlation (black circles) and associated  $P$ -value (red circles) between the nascent RNA folding strength ( $F_{\text{RNA}}$ ) of a gene and the mutation rate of the gene in yeast genomic analysis is robust to the window size (between 10 and 40 nucleotides) in  $F_{\text{RNA}}$  prediction.
