# Supplementary material for: Nascent RNA folding mitigates transcription-associated mutagenesis
Source: HighWire-hosted journal article supplement (doi:10.1101/gr.195164.115), 2015-10-30
Supplement: Supplemental_Methods.docx [file Supplemental_Methods.docx]

**Supplementary METHODS**

**Modified versions of *CAN1***

We randomly changed 5% of synonymous sites in the coding region of the wild-type *CAN1*, with the constraint that (i) the first 60 nucleotides of the coding sequence were unaltered to avoid potential interferences with the reported 5’ translational elongation “ramp”([Tuller et al. 2010](#_ENREF_15)) or translational initiation ([Kudla et al. 2009](#_ENREF_10); [Gu et al. 2010](#_ENREF_8)) and (ii) the final 63 nucleotides were unchanged to ensure a high efficiency of homologous recombination. Briefly, wild-type *CAN1* (except the 5' most 60 nucleotides and 3' most 63 nucleotides) was divided into eleven 150-nucleotide fragments. The first fragment was randomly mutated at 8 synonymous sites followed by *F*RNA prediction by RNAfold with window size *L* = 150 nucleotides. This procedure was repeated 10,000 times, and the 20 versions with the highest *F*RNA were selected. The same was done for the second 150-nucleotide fragment. Of the 400 combinations of the 20 versions of the first fragment and 20 versions of the second fragment, the 10 versions of the concatenated 300-nucleotide RNA with the highest *F*RNA were selected. Here, *F*RNA was determined using overlapping windows with *L* = 150 nucleotides and step size *S* = 1 nucleotide. Then, the 20 versions of the third 150-nucleotide fragment with the highest *F*RNA were chosen and concatenated with the 10 chosen 300-nucleotide RNAs. Of the 200 versions of the concatenated 450-nucletide RNA, the 10 versions with the highest *F*RNA were selected. This process was repeated until all fragments were concatenated and the sequence with the highest *F*RNA was selected. We similarly designed a *CAN1* sequence with the lowest *F*RNA. The modified *CAN1* DNA sequences (Table S1) were synthesized by Blue Heron Biotechnology.

**Strain construction**

The haploid *S. cerevisiae* strain BY4741 was used for *CAN1* forward-mutation assay. The *hyg* marker from PBS10 (Addgene) and the *pGAL1-*I*-Sce*I*-kanMX4-KlURA3* cassette from pGSKU ([Storici and Resnick 2006](#_ENREF_13)) were respectively used to replace the coding region of *Gal80* and *CAN1* by homologous recombination. The strong *F*RNA, weak *F*RNA, and wild-type versions of *CAN1* were each used to replace *pGAL1-*I*-Sce*I*-kanMX4-KlURA3* and I*-Sce*I-*kanMX4-KlURA3*, generating *pCAN-CAN1* *gal80* strains and *pGAL-CAN1 gal80* strains. In order to overexpress *RNase H1*, the *pTDH3-RNaseH1-kanMX6* cassette from plasmid p425-GPD ([Wahba et al. 2011](#_ENREF_16)) was used to replace the coding region of *HO*. Note that the *RNase H1* gene in the cassette is of human origin, but prior studies showed that it functions in yeast ([Wahba et al. 2011](#_ENREF_16)). All primers used for homologous recombination are listed in Table S2. All constructs were confirmed by Sanger sequencing.

**DRIP followed by quantitative PCR**

The DRIP experiment was performed following a published protocol ([El Hage et al. 2014](#_ENREF_4)) with minor modifications. Briefly, crosslinking of exponentially growing yeast cells (OD600 = 0.7, 10ml) with formaldehyde (1%) was conducted for 25 min at room temperature. Formaldehyde was quenched by 360 mM glycine for 5 min, and the pellet was washed with TBS. Pellets were re-suspended with 400 uL of FA-1 lysis buffer [50 mM HEPES at pH 7.5, 140 mM NaCl, 1% Triton X-100, 0.1% w/v sodium deoxycholate, 1 mM EDTA at pH 8, plus CPI-EDTA 1× (Roche COMPLETE MINI)], mixed with 200 uL of glass beads (Sigma), and vortexed for 15 min at full speed at 0°C. Glass beads were removed. Cross-linked chromatin was recovered by centrifugation at full speed for 15 min at 4°C. Supernatant was discarded and 800 uL of FA-1 buffer (plus CPI-EDTA 1×) was added on the top of the pellet. Cells were placed on 0°C and sonicated to obtain DNA fragments of about 150 bp (six pulses, 15 seconds on and 15 seconds off, at a power setting of 3 on a VirTis VirSonic 100 sonicator). Sonicated chromatins were spun for 15 min at full speed at 4°C and 5% glycerol was added to the supernatant. Sonicated chromatins were mixed with 25 ug of IgG2a of antibody S9.6 (Kerafast) and 100 ul of prewashed Protein A sepharose CL-4B beads (GE Healthcare) on a rotating wheel overnight at 4°C. Beads were recovered and washed successively with FA-1 buffer (plus CPI-EDTA 1×), FA-2 buffer (as FA-1 buffer but with 500 mM NaCl, plus CPI-EDTA 1×), FA-3 buffer (10 mM Tris-HCl at pH 8, 0.25 M LiCl, 0.5% NP-40, 0.5% w/v sodium deoxycholate, 1 mM EDTA at pH 8, plus CPI-EDTA 1×), and TE (100 mM Tris-Cl at pH 8, 10 mM EDTA at pH 8) at 4°C. Washed beads were incubated overnight at 65°C in 150 uL of TE buffer containing 1% SDS and 1 mg/mL proteinase K. DNA was purified using Qiagen QIAquick PCR Purification Kit and eluted with 50 uL of buffer EB containing RNase A (0.5 ug/mL). Quantitative PCR was performed on 7500 Fast Real-Time PCR System (Applied Biosystems) in 10 ul reaction containing: 5 ul of 2×TaKara SYBR premix Ex Taq II (Tli RNase H Plus), 1 ul DNA, 0.4 ul of 10 uM primers, 0.4 ul of Rox II and 3.2 ul of water. Primers for *ACT1* andtwo segments of *CAN1* are listed in Table S2. Because the weak and strong *F*RNA versions of *CAN1* contain 5% sequence differences, it is important to ensure that the primers used in quantitative PCR amply the two versions with comparable efficiencies. We designed each primer to have a Tm of 59-61°C for both versions, using National Center for Biotechnology Information Primer3-BLAST. For segment 1, primer 1 has no mismatch with either version, while primer 2 has 0 and 3 mismatches with the weak and strong versions, respectively. For segment 2, primer 1 has 1 and 0 mismatch with the two versions, respectively, while primer 2 has 0 and 1 mismatch with the two versions, respectively. The reaction was repeated six times for each gene/segment from each of three DRIP extractions. The crossing-point values were determined in the supplied software of the instrument with the default setting. The difference in crossing point value measured for *ACT1* and each of the two *CAN1* segments was calculated. The expression level was quantified as 2 to the power of the crossing-point-value difference.

**Forward-mutation assay**

For each strain, a single colony was grown at 30°C in 5 mL synthetic complete (SC) medium overnight. About 2.4×106 cells were cultured and grown in 4 mL SC medium for 4 hours at 30°C to refresh the cells. About 1.0×107 cells were cultured and grown in 8 mL YPGE medium (1% yeast extract, 2% bactopeptone, 2% glycerol, and 2% ethanol) at 30°C until OD660≈0.68 (about 8.0×107 cells) to accumulate forward mutations. Before and after the cells were grown in YPGE, cell density was measured by plating dilutions on YPD plates and counting colonies after growth for 2 days at 30°C, which allowed the estimation of the number of generations for which the cells grew in YPGE. We selected CANR mutants by plating cells on SC-arg (SC medium without arginine) plates containing L-canavanine (60 mg/L; Sigma-Aldrich). Colonies were counted after growth for 3 days at 30°C ([Lippert et al. 2011](#_ENREF_11); [Takahashi et al. 2011](#_ENREF_14)). The absolute mutation frequency of a strain was estimated by the number of CANR colonies divided by the total number of cells after the growth in YPGE, and then multiplied by the true positive rate (see the next section). This procedure was replicated 24 times for each strain. Our experiment differed from typical fluctuation tests in that we limited cell growth in the permissive YPGE medium to only three generations (instead of >10 generations), which decreased the variance of mutation frequency and rendered our experiment more sensitive than typical fluctuation tests.

**Quantifying *CAN1* expression level by quantitative RT-PCR**

We used the RNeasy MiniKit (Qiagen) to extract the total RNA from exponentially growing cells. The RNA extraction was replicated twice for each strain. The total RNA (450 ng) was reverse transcribed using the PrimeScript RT reagent Kit (Takara) with 25 picomoles of Oligo(dT) primers (Takara). *CAN1* and *ACT1* primers for quantitative RT-PCR were designed using National Center for Biotechnology Information (NCBI) Primer3-BLAST (Table S2). The RT-PCR was carried out on a Applied Biosystems 7500 Fast Real-Time PCR System with a 20 μL reaction volume containing cDNAs less than 100 ng, 1X SYBR Premix Ex Taq (Takara), and 4 picomoles each of forward and reverse primers. The reaction was repeated five times for each gene from each RNA extraction. The crossing-point values were determined in the supplied software of the instrument with the default setting. The differences of crossing point values measured for *CAN1* and *ACT1* in each strain were calculated. The expression level was quantified as 2 to the power of the crossing-point-value difference.

**Distances between pauses of RNAP II**

The yeast native elongating transcript (NET-seq) data ([Churchman and Weissman 2011](#_ENREF_2)) were from *S. cerevisiae* strain BY4741 grown in YPD at 30°C, and were downloaded from NCBI (accession numbers: SRR072819-SRR072822). The first 35 bases of single-end reads were aligned by SOAP to the S288C genome sequence from SGD. Only uniquely mapped reads with ≤1 mismatch were considered. We masked all 35-mers in the genome sequence that have non-self matches in the genome using SOAP, allowing up to 1 mismatch. The RNAP II occupancy of a site was defined by the number of reads whose 5' most nucleotide is mapped to the site. The RNAP II occupancy of a gene was defined by the mean RNAP II occupancy of all of its nucleotide positions annotated by SGD. Overlapping regions between multiple genes were not considered. RNAP II pausing positions were defined by a RNAP II occupancy that is at least three standard deviations above the mean for the gene ([Churchman and Weissman 2011](#_ENREF_2)). Distances between consecutive RNAP II pausing positions were calculated, excluding pairs of pausing positions whose inter-pausing regions contain any masked sequence.

The human global run-on-sequencing (GRO-seq) data were downloaded from NCBI (accession numbers: SRR014283-SRR014287). These data were generated by nuclear run-on assays to extend nascent RNAs that are associated with transcriptionally engaged polymerases under conditions where new initiation is prohibited ([Core et al. 2008](#_ENREF_3)). The distances between pauses of RNAP II in human were measured in a similar manner as in yeast, with minor modifications. Briefly, the first 33 bases of single-end reads were aligned by SOAP to human genome from Ensembl (version 54). Only uniquely mapped reads with ≤1 mismatch were considered. We masked all 33-mers of the genome sequence that have non-self matches in the genome using SOAP, allowing up to 1 mismatch. The RNAP II occupancy of a site was defined as the number of reads whose 5' most nucleotide is mapped to this site. The RNAP II occupancy of a gene was defined by the mean RNAP II occupancy of its nucleotide positions annotated by Ensembl. Overlapping regions of multiple genes were removed. Only introns between two constitutive exons were considered when estimating the median pause distance in introns and only these constitutive exons were considered when estimating the median pause distance in exons. RNAP II pause sites in introns (or exons) were identified by an RNAP II occupancy level that is at least three standard deviations above the mean in the introns (or exons) of the gene. Distances between consecutive RNAP II pause sites were calculated, excluding pairs of pause sites whose inter-pausing regions contain any masked sequence.

**R-loop scores**

The yeast DNA-RNA immunoprecipitation tiling microarray (DRIP-chip) data for genome-wide detection of RNA-DNA hybrid-prone loci ([Chan et al. 2014](#_ENREF_1)) were downloaded from NCBI GEO (GSE46652). The method relied on the intrinsic specificity of the S9.6 antibody for R-loop molecules and enabled specific and near quantitative recovery of R-loop molecules ([Ginno et al. 2012](#_ENREF_6)). Here we used DRIP-chip data generated using *S. cerevisiae* strain BY4741 with control plasmid grown in SC medium without leucine at 30°C. Probes in an identical probe set (_s set) include additional pruning sequences. Probes in a mixed probe set (_x set) contain at least one probe that cross-hybridizes with other sequences. These two kinds of control probe sets were removed from further analysis, resulting in each gene having only one probe set and one intensity of RNA-DNA hybrid. The intensity of RNA-DNAhybrid of each probe set was extracted using Expression ConsoleTM Software (Affymetrix) with the MAS5.0 algorithm ([Pepper et al. 2007](#_ENREF_12)) by Chan and colleagues ([Chan et al. 2014](#_ENREF_1)), and was defined as the R-loop score of the gene. The intensity of RNA-DNA hybrid in each probe was extracted from CEL-files downloaded from NCBI GEO (GSE46652) using Package affxparser by R (http://www.bioconductor.org/packages/release/bioc/html/affxparser.html), and was defined as the R-loop score of the probe.

The dataset of yeast R-loops based on RNase H targets ([El Hage et al. 2014](#_ENREF_4)) were downloaded from NCBI (accession numbers: SRR1312928, SRR1312929, SRR1312932, SRR1312933). We used the wild-type data and the corresponding control data (input-chromatin). The procedure of genome masking and short read alignment was the same as in the analysis of the NET-seq data. Let the number of reads whose 5’ most nucleotide maps to a given site be *N*. Let us define *X* = log2((*N*+1)/*M*), where *M* is the sum of *N* over all sites in the genome. The R-loop score of a site was defined by *X* calculated from the wild-type data divided by *X* calculated from the input-chromatin data for the site.

The human DNA-RNA immunoprecipitation sequencing (DRIP-seq) data ([Ginno et al. 2013](#_ENREF_5)) were downloaded from NCBI (accession numbers: SRR797878-SRR797880). We used the DRIP-seq data in which DNA was fragmented with BamHI, NcoI, ApaLI, NheI, and PvuII, and the corresponding control sequencing (control-seq) data without treatment by S9.6 antibody. The procedure of genome masking and short read alignment was the same as in the analysis of the GRO-seq data. Let the number of reads whose 5’ most nucleotide is mapped to a given site be *N*. A pseudocount of *N* = 0.01 was given for sites not covered by any read. Let us define *X* = log2(*N*/*M*), where *M* is the sum of *N* over all sites in the genome. The R-loop score of a site was defined by *X* calculated from the DRIP-seq data divided by *X* calculated from the control-seq data for the site.

**Nucleosome occupancy**

The DNA micrococcal-nuclease-digested sequencing (MNase-seq) data ([Weiner et al. 2010](#_ENREF_17)) generated from *S. cerevisiae* strain BY4741 in YPD at 28°C were downloaded from NCBI (accession number: SRR032451) to estimate the nucleosome occupancy of each nucleotide position ([Yuan et al. 2005](#_ENREF_18)). The procedure of genome masking and short read alignment was the same as in the analysis of the NET-seq data. The nucleosome occupancy level of a nucleotide position was defined as the number of reads whose 5’ most nucleotide is mapped to the site. The nucleosome occupancy level of a gene was defined by the mean nucleosome occupancy level of all of its nucleotides annotated by SGD. Overlapping regions between multiple genes were excluded.

**Replication timing**

DNA replication timing data ([Koren et al. 2010](#_ENREF_9)) were previously collected from *S. cerevisiae* strain BY4741 grown in YPD at 30°C. The replication timing was estimated by FACS-sorting G1- and S-phase cells and co-hybridizing their DNA to Agilent genomic tiling arrays; a higher S-to-G1 signal ratio indicates earlier replication ([Koren et al. 2010](#_ENREF_9)). The original report normalized the hybridization intensity to a mean of 0 and a standard deviation of 1 and provided one value per 10 nucleotides from the leftmost to the rightmost probe on each chromosome ([Koren et al. 2010](#_ENREF_9)). We downloaded the DNA replication timing data from NCBI GEO (accession number: GSE17120), and defined the replication timing of a gene as the mean value of these 10-nucleotide-spaced genomic sites that are covered by the gene, where gene annotation was downloaded from NCBI GEO (GPL4131).

**REFERENCES**

Chan YA, Aristizabal MJ, Lu PY, Luo Z, Hamza A, Kobor MS, Stirling PC, Hieter P. 2014. Genome-wide profiling of yeast DNA:RNA hybrid prone sites with DRIP-chip. *PLoS Genet* **10**(4): e1004288.

Churchman LS, Weissman JS. 2011. Nascent transcript sequencing visualizes transcription at nucleotide resolution. *Nature* **469**(7330): 368-373.

Core LJ, Waterfall JJ, Lis JT. 2008. Nascent RNA sequencing reveals widespread pausing and divergent initiation at human promoters. *Science* **322**(5909): 1845-1848.

El Hage A, Webb S, Kerr A, Tollervey D. 2014. Genome-wide distribution of RNA-DNA hybrids identifies RNase H targets in tRNA genes, retrotransposons and mitochondria. *PLoS Genet* **10**(10): e1004716.

Ginno PA, Lim YW, Lott PL, Korf I, Chedin F. 2013. GC skew at the 5' and 3' ends of human genes links R-loop formation to epigenetic regulation and transcription termination. *Genome Res* **23**(10): 1590-1600.

Ginno PA, Lott PL, Christensen HC, Korf I, Chedin F. 2012. R-loop formation is a distinctive characteristic of unmethylated human CpG island promoters. *Mol Cell* **45**(6): 814-825.

Gong J. 2008. *A Systematic Screen of the Saccharomyces cerevisiae Deletion Mutant Collection for Novel Genes Required for DNA Damage-induced Mutagenesis*. ProQuest, Ann Arbor.

Gu W, Zhou T, Wilke CO. 2010. A universal trend of reduced mRNA stability near the translation-initiation site in prokaryotes and eukaryotes. *PLoS Comput Biol* **6**(2): e1000664.

Koren A, Soifer I, Barkai N. 2010. MRC1-dependent scaling of the budding yeast DNA replication timing program. *Genome Res* **20**(6): 781-790.

Kudla G, Murray AW, Tollervey D, Plotkin JB. 2009. Coding-sequence determinants of gene expression in Escherichia coli. *Science* **324**(5924): 255-258.

Lippert MJ, Kim N, Cho JE, Larson RP, Schoenly NE, O'Shea SH, Jinks-Robertson S. 2011. Role for topoisomerase 1 in transcription-associated mutagenesis in yeast. *Proc Natl Acad Sci U S A* **108**(2): 698-703.

Pepper SD, Saunders EK, Edwards LE, Wilson CL, Miller CJ. 2007. The utility of MAS5 expression summary and detection call algorithms. *BMC Bioinformatics* **8**: 273.

Storici F, Resnick MA. 2006. The delitto perfetto approach to in vivo site-directed mutagenesis and chromosome rearrangements with synthetic oligonucleotides in yeast. *Methods Enzymol* **409**: 329-345.

Takahashi T, Burguiere-Slezak G, Van der Kemp PA, Boiteux S. 2011. Topoisomerase 1 provokes the formation of short deletions in repeated sequences upon high transcription in Saccharomyces cerevisiae. *Proc Natl Acad Sci U S A* **108**(2): 692-697.

Tuller T, Carmi A, Vestsigian K, Navon S, Dorfan Y, Zaborske J, Pan T, Dahan O, Furman I, Pilpel Y. 2010. An evolutionarily conserved mechanism for controlling the efficiency of protein translation. *Cell* **141**(2): 344-354.

Wahba L, Amon JD, Koshland D, Vuica-Ross M. 2011. RNase H and multiple RNA biogenesis factors cooperate to prevent RNA:DNA hybrids from generating genome instability. *Mol Cell* **44**(6): 978-988.

Weiner A, Hughes A, Yassour M, Rando OJ, Friedman N. 2010. High-resolution nucleosome mapping reveals transcription-dependent promoter packaging. *Genome Res* **20**(1): 90-100.

Yuan GC, Liu YJ, Dion MF, Slack MD, Wu LF, Altschuler SJ, Rando OJ. 2005. Genome-scale identification of nucleosome positions in S. cerevisiae. *Science* **309**(5734): 626-630.
